# Supplementary material
Source: PubMed Central journal article supplement (PMC6939622)
Supplement: NIHMS1031758-supplement-1.pdf [file NIHMS1031758-supplement-1.pdf]

## Supplementary Digital Content 1. Mauve-Sequence Alignment.

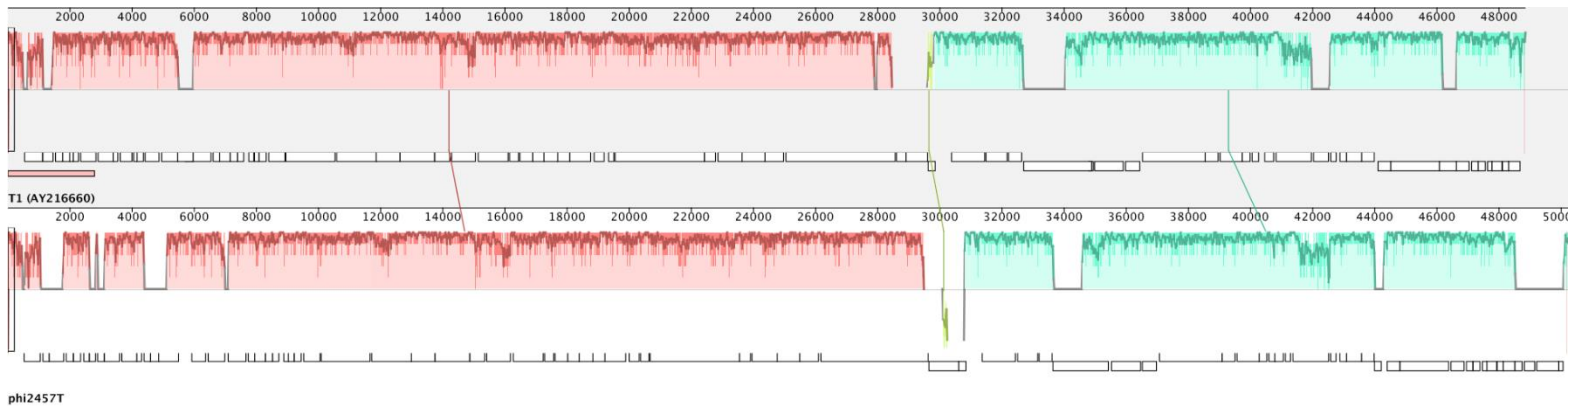

The genome of  $\Phi 2457T$  was aligned to the previously characterized *E. coli* phage T1 using the progressiveMauve tool (27) in Geneious R9 (Biomatters Ltd.). Colored regions indicate locally collinear blocks (LCBs) free from genomic rearrangements, with graph height indicating similarity. These alignments showed ~70% pairwise identity at the nucleotide level.
